# Supplementary material for: Radiation response of Y3Al5O12 and Nd3+–Y3Al5O12 to Swift heavy ions: insight into structural damage and defect dynamics
Source: Royal Society of Chemistry journal article supplement (doi:10.1039/d3cp02734a), 2023-01-01
Supplement: d3cp02734a1.pdf [file d3cp02734a1.pdf]

## Supporting information

### **Insight into swift heavy ion radiation response of $Y_3Al_5O_{12}$ and $Nd^{3+}$ - $Y_3Al_5O_{12}$ : Structural damage and defect dynamics**

Koushik Bhandari,<sup>a,f</sup> V. Grover,<sup>\*b,f</sup> P. Kalita,<sup>c</sup> K. Sudarshan,<sup>d,f</sup> B. Modak,<sup>b,f</sup> Saurabh K  
Sharma,<sup>e</sup> P. K. Kulriya<sup>e</sup>

<sup>a</sup>Radiometallurgy Division, Bhabha Atomic Research Centre, Mumbai- 400085, India

<sup>b</sup>Chemistry Division, Bhabha Atomic Research Centre, Mumbai- 400085, India

<sup>c</sup>School of Engineering, University of Petroleum & Energy Studies, Dehradun- 248007, India

<sup>d</sup>Radiochemistry Division, Bhabha Atomic Research Centre, Mumbai- 400085, India

<sup>e</sup>School of Physical Sciences, Jawahar Lal Nehru University, New Delhi- 110067, India

<sup>f</sup>Homi Bhabha National Institute, Mumbai- 400094, India

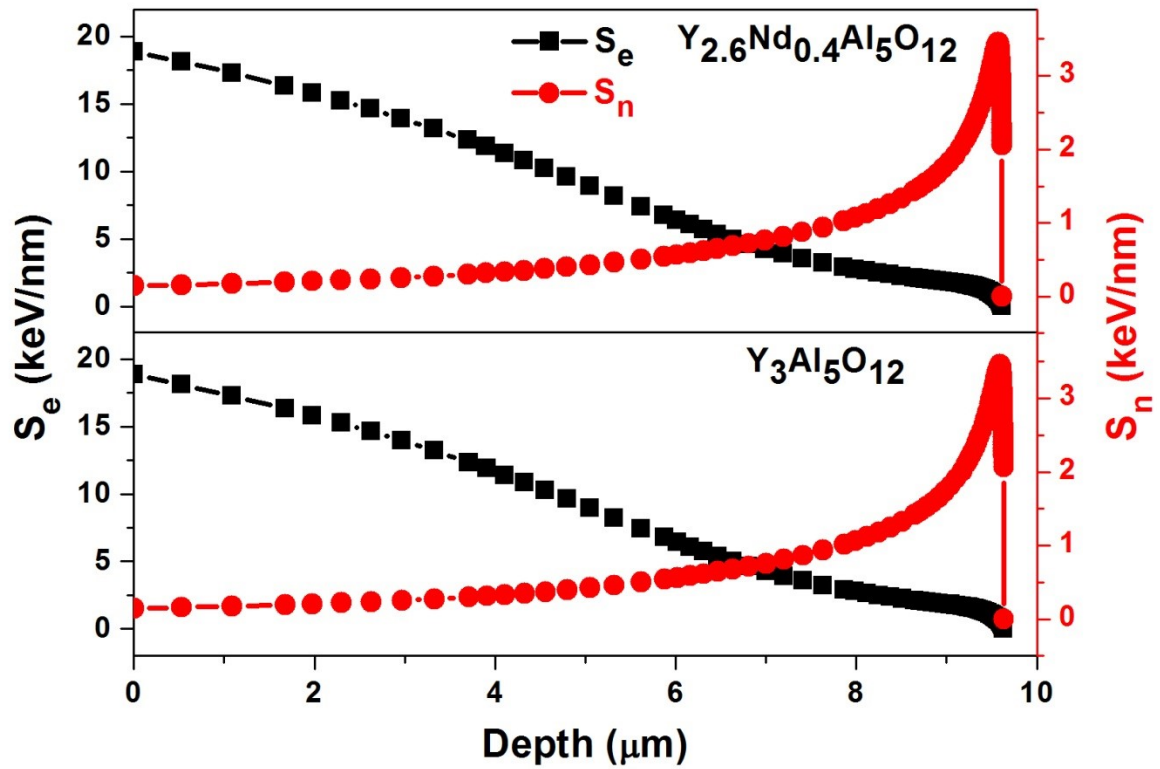

**Fig. S1:** Depth profile of electronic stopping power ( $S_e$ ), nuclear stopping powers ( $S_n$ ) of 100 MeV I ions in  $Y_3Al_5O_{12}$  and  $Y_{2.6}Nd_{0.4}Al_5O_{12}$ .

(a)

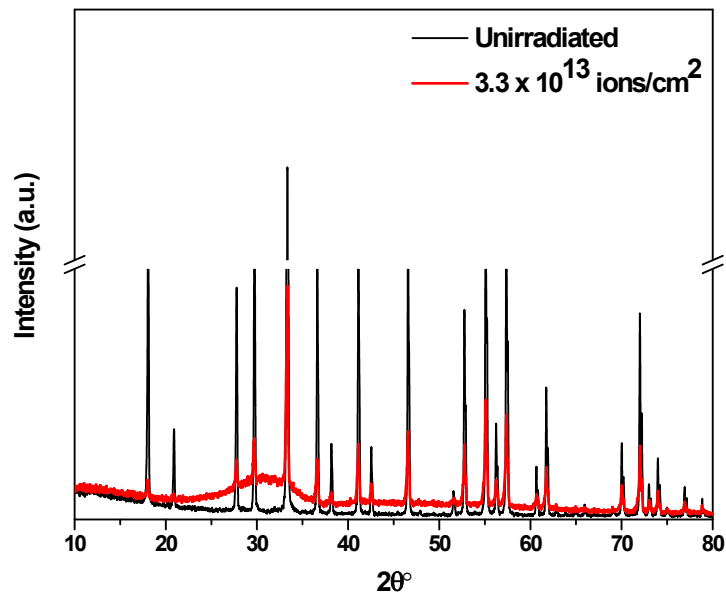

(b)

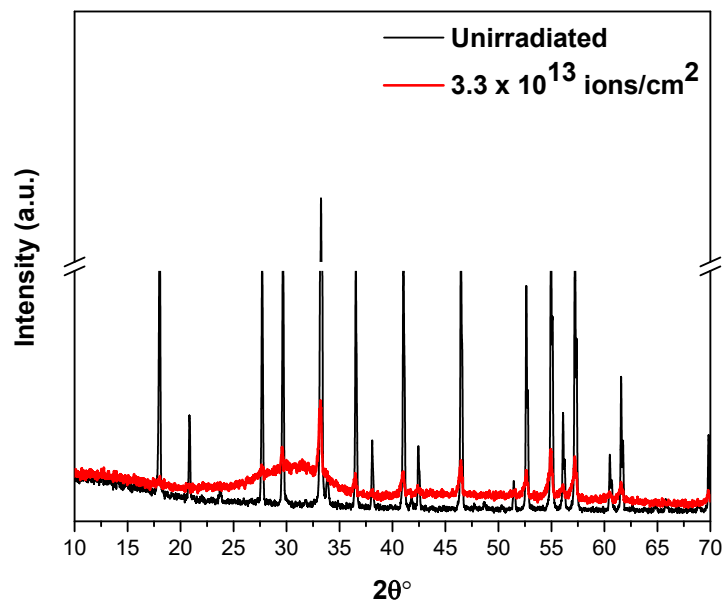

**Fig. S2:** Broad hump at  $\sim 2\theta = 20^\circ$ - $40^\circ$  for (a)  $\text{Y}_3\text{Al}_5\text{O}_{12}$  and (b)  $\text{Y}_{2.6}\text{Nd}_{0.4}\text{Al}_5\text{O}_{12}$  indicates coexistence amorphous phase with crystalline phase after irradiation.

(a)

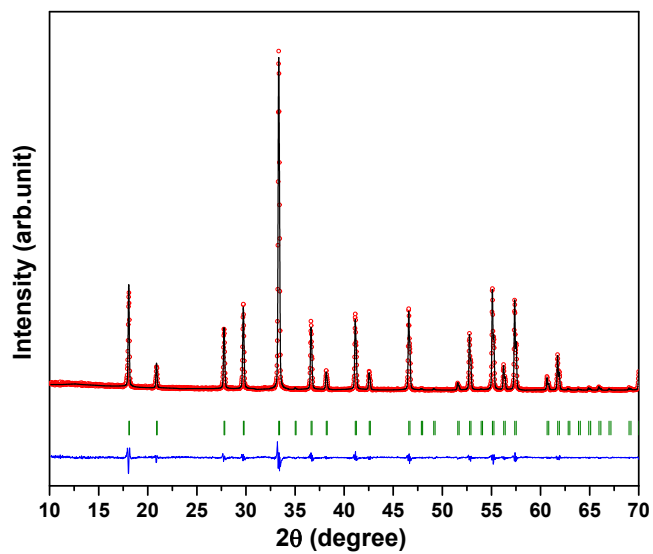

(b)

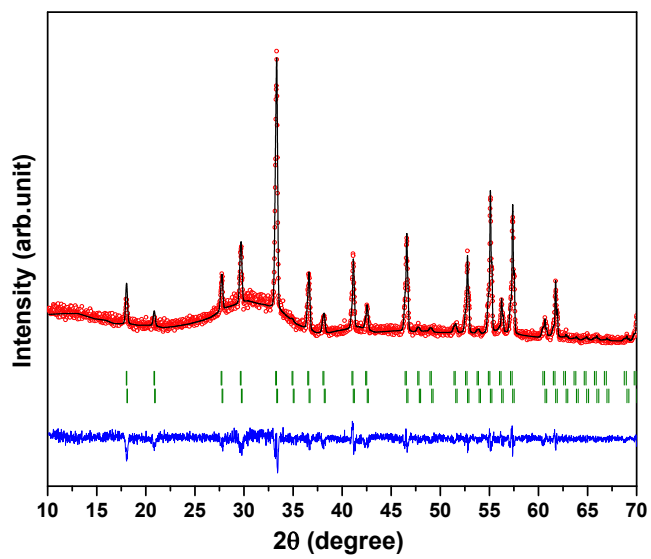

**Fig. S3:** LeBail refinement plot of Y<sub>3</sub>Al<sub>5</sub>O<sub>12</sub> at (a) pristine condition and (b) after irradiated at a fluence of 3 × 10<sup>13</sup> ions/cm<sup>2</sup>. The vertical lines indicate Bragg positions for cubic garnet.

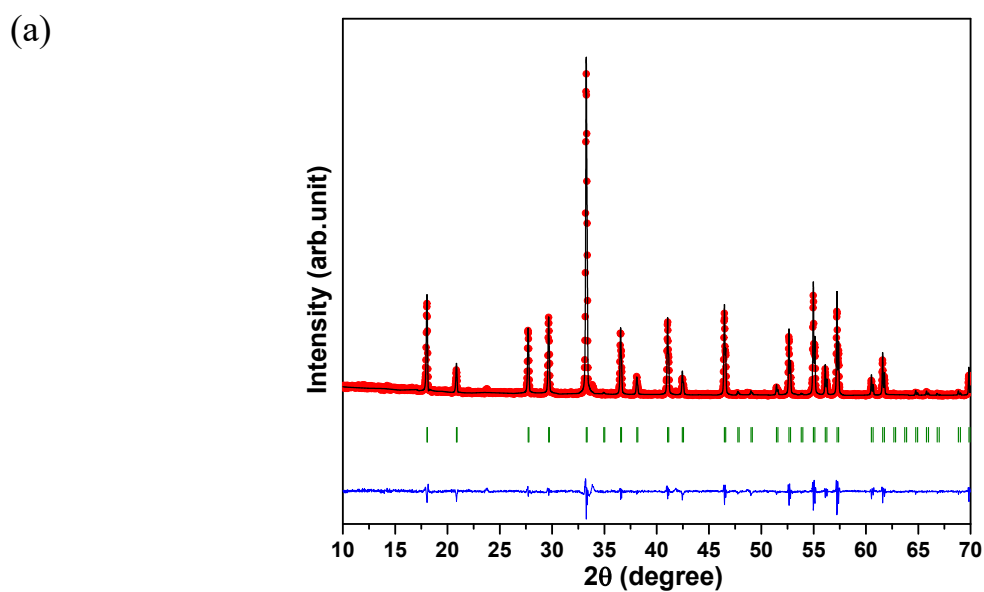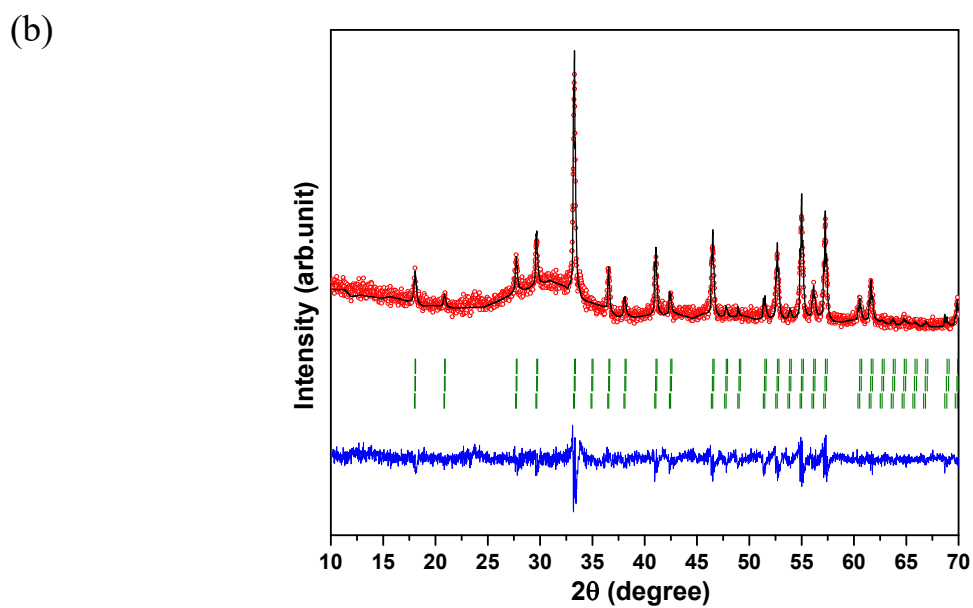

**Fig. S4:** LeBail refinement plot of  $\text{Y}_{2.6}\text{Nd}_{0.4}\text{Al}_5\text{O}_{12}$  at (a) pristine condition and (b) after irradiated at a fluence of  $1 \times 10^{13}$  ions/cm<sup>2</sup>. The vertical lines indicate Bragg positions for cubic garnet.

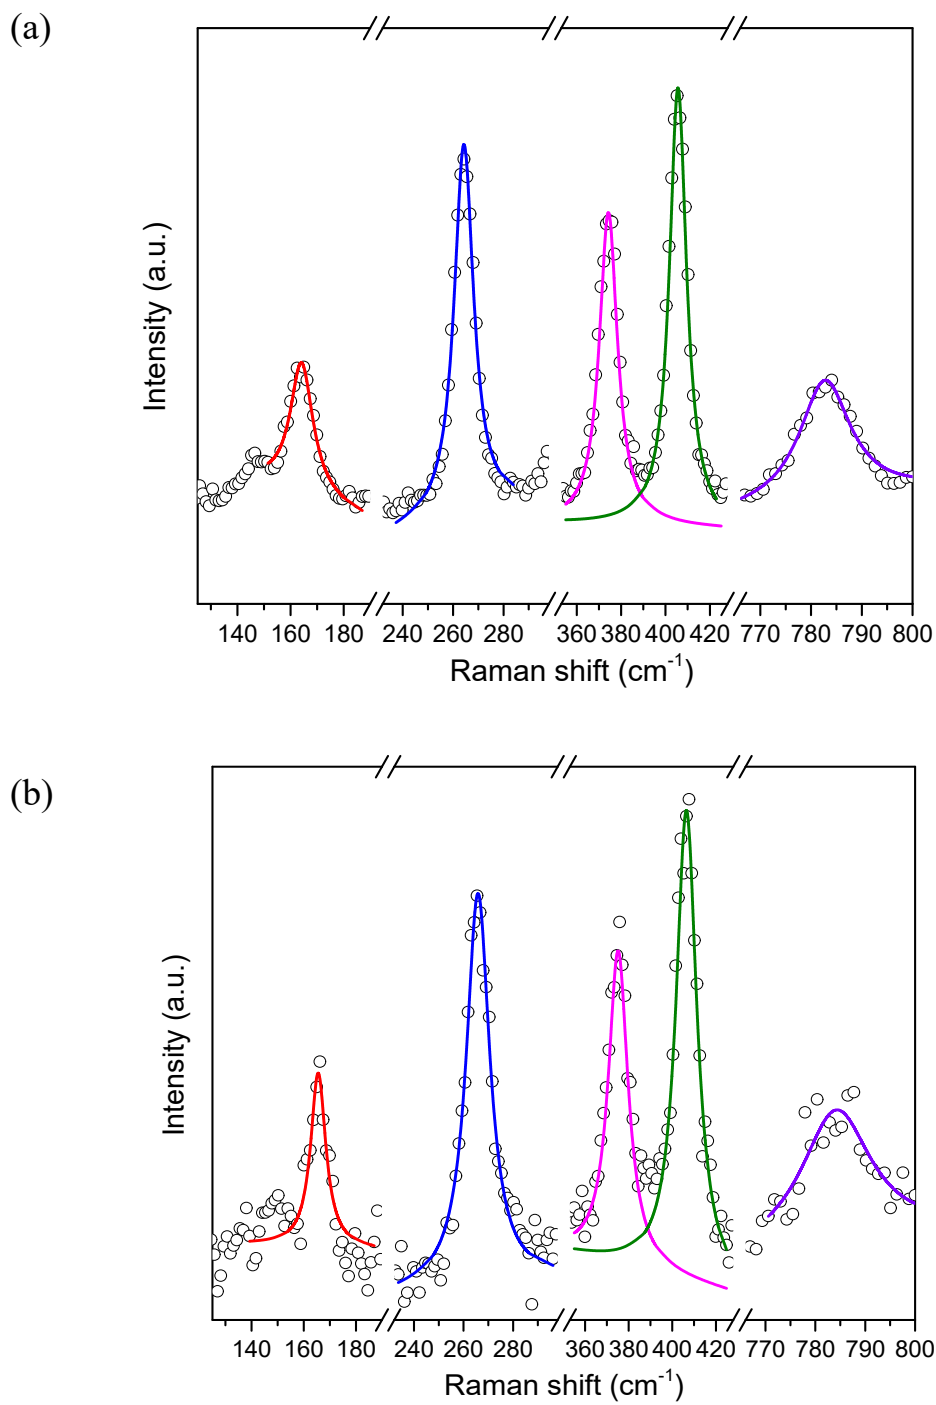

**Fig. S5:** Representative fitted Raman modes of Nd-YAG at (a) pristine condition and (b) after irradiated at a fluence of  $1 \times 10^{13}$  ions/cm<sup>2</sup>.

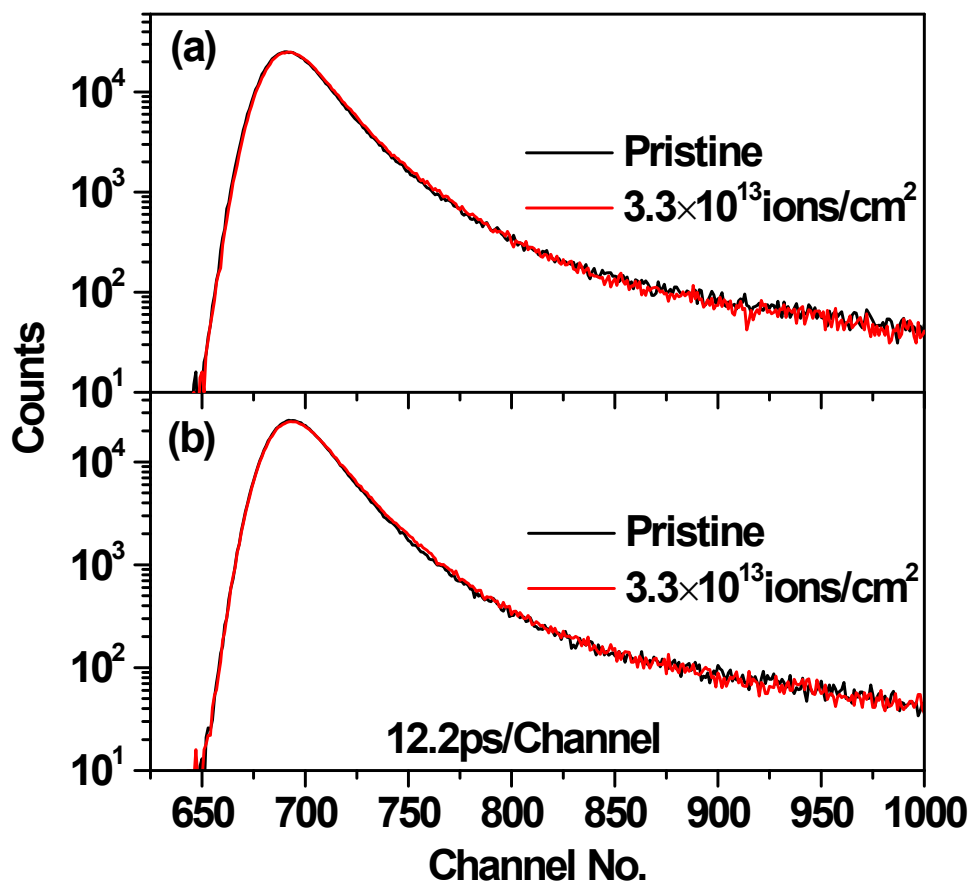

**Fig. S6.** PALS spectra of (a) YAG and (b) Nd-YAG at pristine and irradiated (at  $3.3 \times 10^{13}$  ions/cm<sup>2</sup>) condition.

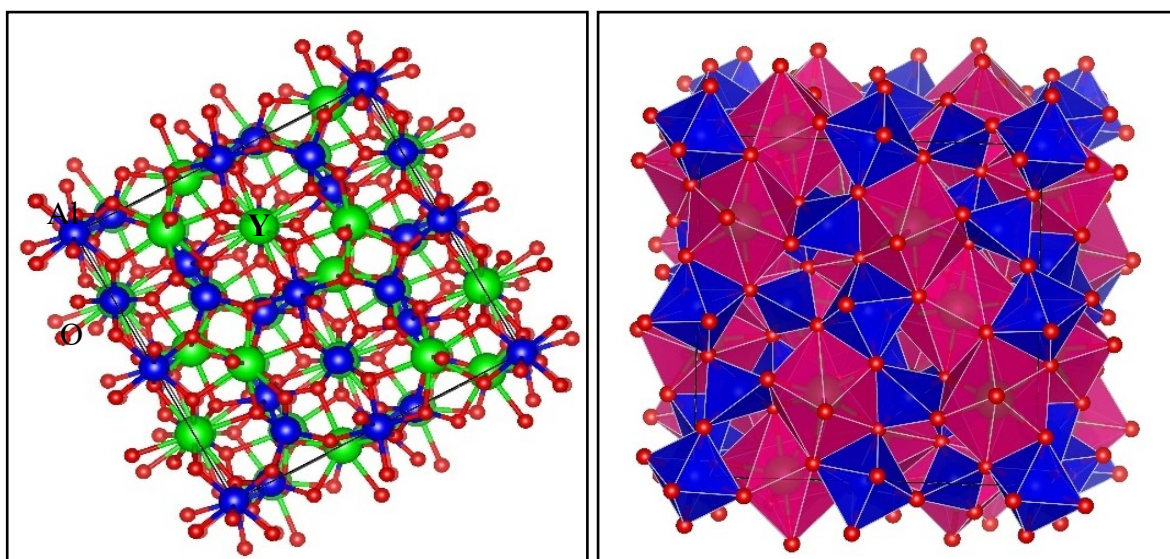

**Fig. S7:** Crystal structure for  $\text{Y}_3\text{Al}_5\text{O}_{12}$ . Blue polyhedra indicates  $\text{AlO}_4$  and  $\text{AlO}_6$  units, while pink polyhedra indicates  $\text{YO}_8$  unit.



**Table S1:** Elemental analysis results of  $\text{Y}_3\text{Al}_5\text{O}_{12}$  and  $\text{Y}_{2.6}\text{Nd}_{0.4}\text{Al}_5\text{O}_{12}$ .

| <b>Nominal Composition</b>                              | <b>Y (atom%)<br/>Determined<br/>(Expected)</b> | <b>Nd (atom%)<br/>Determined<br/>(Expected)</b> | <b>Al (atom%)<br/>Determined<br/>(Expected)</b> |
|---------------------------------------------------------|------------------------------------------------|-------------------------------------------------|-------------------------------------------------|
| $\text{Y}_3\text{Al}_5\text{O}_{12}$                    | 38<br>(37.5)                                   | -                                               | 62<br>(62.5)                                    |
| $\text{Y}_{2.6}\text{Nd}_{0.4}\text{Al}_5\text{O}_{12}$ | 35<br>(32.5)                                   | 5<br>(5)                                        | 60<br>(62.5)                                    |

**Table S2:** Comparison of Raman frequencies of select modes in unirradiated sample and sample irradiated at  $1 \times 10^{13}$  ions/cm<sup>2</sup>

| Raman Mode for unirradiated sample |                          |            | Raman Mode for irradiated sample at a fluence of $1 \times 10^{13}$ ions/cm <sup>2</sup> |                          |            |
|------------------------------------|--------------------------|------------|------------------------------------------------------------------------------------------|--------------------------|------------|
| Wavenumber (cm <sup>-1</sup> )     | FWHM (cm <sup>-1</sup> ) | 2 $\sigma$ | Wavenumber (cm <sup>-1</sup> )                                                           | FWHM (cm <sup>-1</sup> ) | 2 $\sigma$ |
| 164.1                              | 10.6                     | 0.3        | 165.5                                                                                    | 7.1                      | 0.6        |
| 264.3                              | 9.4                      | 0.2        | 265.8                                                                                    | 11.5                     | 0.3        |
| 374.2                              | 9.9                      | 0.2        | 375.2                                                                                    | 11.0                     | 0.4        |
| 405.6                              | 9.4                      | 0.2        | 406.5                                                                                    | 11.6                     | 0.2        |
| 782.7                              | 12.3                     | 0.4        | 784.2                                                                                    | 17.3                     | 1.2        |

$\sigma$ : standard deviation

**Table S3:** Measured values of thermal conductivity for YAG and Nd-YAG.

| <b>Temperature<br/>(K)</b> | <b>Thermal Conductivity (Wm<sup>-1</sup>K<sup>-1</sup>)</b> |        |
|----------------------------|-------------------------------------------------------------|--------|
|                            | YAG                                                         | Nd-YAG |
| 300                        | 7.377                                                       | 5.081  |
| 373                        | 6.054                                                       | 4.174  |
| 473                        | 5.406                                                       | 3.796  |
| 573                        | 4.95                                                        | 3.432  |
| 673                        | 4.602                                                       | 3.23   |
| 773                        | 4.296                                                       | 3.131  |
| 873                        | 4.109                                                       | 3.086  |
| 973                        | 3.845                                                       | 3.005  |
| 1073                       | 3.683                                                       | 2.865  |
